# Supplementary material
Source: Springer Nature journal article supplement (https://www.springermedizin.de/resource/supplementary/12885_2014_4574_MOESM2_ESM.pdf/9466724)

Supplementary Figure S1

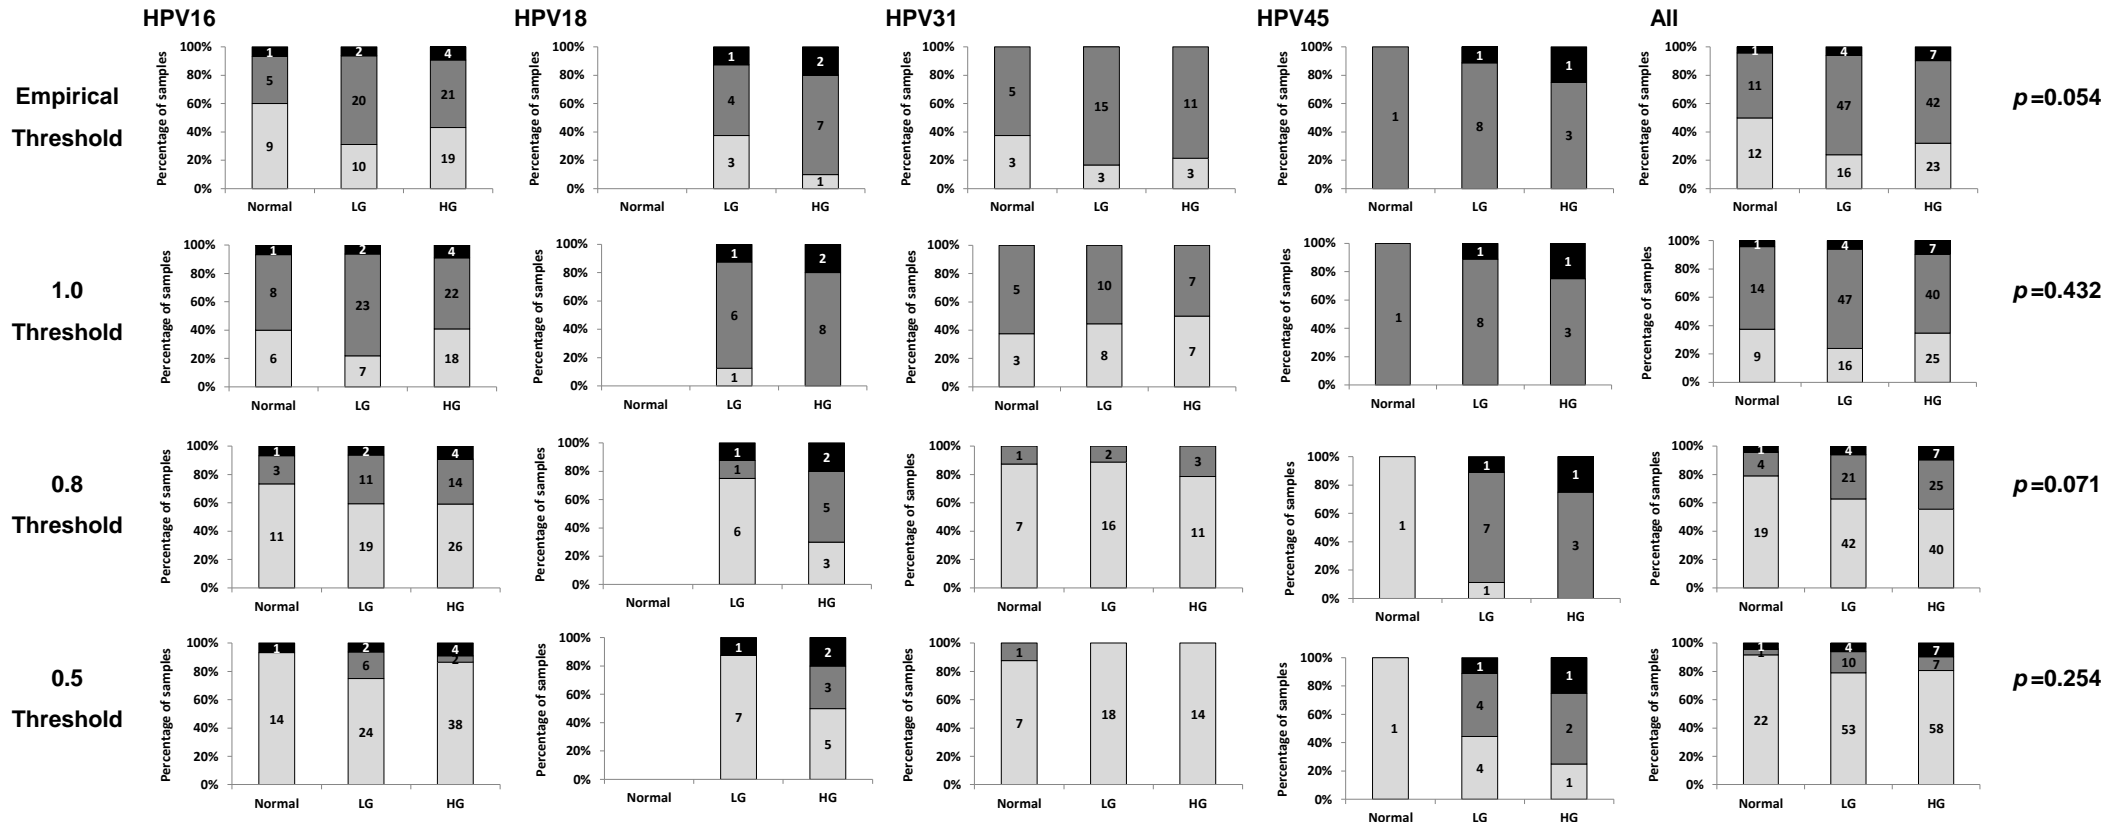

$p=0.054$

$p=0.432$

$p=0.071$

$p=0.254$

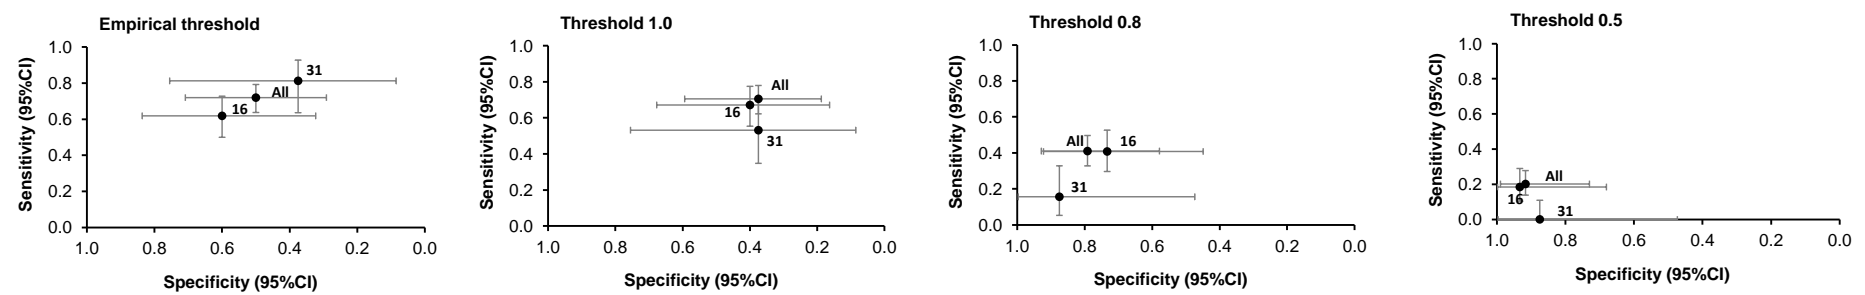

Supplement: MOESM2 [file 9466724]
